# Supplementary material for: ConvAHKG: Action-Based Hybrid Knowledge Graph with a Dual-Channel Convolutional Approach for Drug Repurposing
Source: Research Square preprint supplement (doi:10.21203/rs.3.rs-7558566/v1), 2025-11-26
Supplement: Supplementary file 1 [file 05e444836c20216339e6ed81.xlsx]

## Sheet: Sheet1
Compound-Protein Relations
by_inhibitor_action
by_binder_action
by_agonist_action
by_antibody_action
by_ligand_action
by_activator_action
by_inducer_action
by_modulator_action
by_substrate_action
by_antagonist_action
by_product_of_action
by_downregulator_action
by_cleavage_action
by_stimulator_action
by_other/unknown_action
by_cofactor_action
by_other_action
by_negative_modulator_action
by_partial_agonist_action
by_unknown_action
by_potentiator_action
by_blocker_action
by_inverse_agonist_action
by_intercalation_action
by_inhibitory_allosteric_modulator_action
by_allosteric_modulator_action
by_regulator_action
by_adduct_action
by_multitarget_action
by_stabilization_action
by_partial_antagonist_action
by_suppressor_action
by_carrier_action
by_weak_inhibitor_action
by_neutralizer_action
by_transporter_action
by_oxidizer_action
by_binding_action

## Sheet: Sheet2
Diseas-Protein Relations
Biomarker
GeneticVariation
AlteredExpression
PosttranslationalModification
CausalMutation
Therapeutic

## Sheet: Sheet6
		Summary of datasets with node types, sizes, and database sources
		Node Types	Remarks	Node Size	Database
		Compound		1509	RepoDB
		Disease		1229	RepoDB
		Protein	Protein-protein interactions derived from STRING	2995	DrugBank
		Compound_Type	Includes small molecules and biotech products	2	DrugBank
		Compound_Category		2722	DrugBank
		ATC Code	Four-level hierarchy: anatomical, therapeutic, pharmacological, chemical	1389	DrugBank
		Side Effect		352	SIDER
		Pathway		650	DrugBank
		Sub_Structure	Morgan fingerprints with 1024 binary features	1024	RDKit
		Bond Types	Enzyme, Transporter, Receptor, Target	4	DrugBank
